# Supplementary material
Source: Copernicus journal article supplement (doi:10.5194/egusphere-2026-1944)
Supplement: Supplementary file 1 [file egusphere-2026-1944-supplement.pdf]

## Supplementary Tables

### Use of Spatial Embeddings in Genosoil Identification

**Table S1.** Bootstrap stability of UK genosoil centroids for each pedogenon (B = 2000 resamples, 90 % CI width). The reported CI width summarises the dispersion of cosine similarity between bootstrap centroids and the full centroid, and therefore reflects centroid directional stability. For P2932, bootstrapping was performed on a representative sample of 500,000 pixels from the full genosoil population; the reported CI width is therefore a conservative upper bound.

| <b>Pedogenon</b> | <b>Embedding model</b> | <b>Genosoil pixels</b> | <b>Embedding cohesion</b> | <b>Bootstrap 90% CI width</b> |
|------------------|------------------------|------------------------|---------------------------|-------------------------------|
| 2932             | AlphaEarth             | 35278615               | 0.888                     | 4.967e-08†                    |
| 2932             | Tessera                | 36064279               | 0.8678                    | 4.211e-08†                    |
| 1564             | AlphaEarth             | 1890                   | 0.8946                    | 0.0001932                     |
| 1564             | Tessera                | 2017                   | 0.8186                    | 0.0001999                     |
| 845              | AlphaEarth             | 305                    | 0.926                     | 0.0006407                     |
| 845              | Tessera                | 294                    | 0.9225                    | 0.0005493                     |

† Representative 500,000-pixel bootstrap sample; reported width is a conservative upper bound.

**Table S2.** Global genosoil similarity by country to the UK. Global pedogenon areas: P845 = 1,766,312 ha; P1564 = 3,870,136 ha; P2932 = 1,064,246 ha. Cohesion and HMI-bin silhouette are computed from pixels with HMI  $\leq$  0.10 within each country. Countries with fewer than 20 pixels in any HMI bin are shown without an HMI-bin silhouette value.

| Pedogenon ID | Embedding model | Country              | Pedogenon area in country (ha) | Genosoil area (ha) | Embedding cohesion | HMI-bin silhouette | Cosine similarity to UK centroid |
|--------------|-----------------|----------------------|--------------------------------|--------------------|--------------------|--------------------|----------------------------------|
| 845          | AE 2022         | United Kingdom       | 88.6                           | 3.0                | 0.926              | -0.830             | 1.000                            |
| 845          | AE 2022         | Ireland              | 2898.9                         | 854.7              | 0.878              | -0.961             | 0.907                            |
| 845          | AE 2022         | Georgia              | 10.7                           | 10.8               | 0.884              | -                  | 0.307                            |
| 845          | AE 2022         | USA                  | 611573.8                       | 329485.1           | 0.844              | -0.927             | 0.219                            |
| 845          | AE 2022         | Japan                | 111021.9                       | 44259.8            | 0.817              | -0.714             | 0.181                            |
| 845          | AE 2022         | New Caledonia        | 281.0                          | 268.5              | 0.858              | 0.564              | 0.108                            |
| 845          | AE 2022         | China                | 561985.6                       | 504286.8           | 0.837              | -0.888             | 0.091                            |
| 845          | AE 2022         | Bolivia              | 16.4                           | 16.4               | 0.993              | -                  | 0.090                            |
| 845          | AE 2022         | Australia            | 15590.8                        | 13725.8            | 0.916              | -0.421             | 0.065                            |
| 845          | AE 2022         | New Zealand          | 90267.0                        | 65953.8            | 0.832              | -0.470             | 0.053                            |
| 845          | AE 2022         | Brazil               | 12.7                           | 12.7               | 0.952              | -                  | 0.037                            |
| 845          | AE 2022         | Peru                 | 176.5                          | 163.5              | 0.866              | 0.568              | 0.029                            |
| 845          | AE 2022         | Nepal                | 64150.5                        | 54357.8            | 0.863              | -0.791             | 0.026                            |
| 845          | AE 2022         | Thailand             | 400.3                          | 401.1              | 0.918              | -                  | 0.006                            |
| 845          | AE 2022         | India                | 7031.7                         | 2654.8             | 0.848              | -0.621             | -0.010                           |
| 845          | AE 2022         | Mexico               | 16563.8                        | 12389.9            | 0.882              | -0.887             | -0.015                           |
| 845          | AE 2022         | Myanmar              | 1418.2                         | 1385.3             | 0.872              | -0.617             | -0.038                           |
| 845          | AE 2022         | Central African Rep. | 12.8                           | 0.9                | 0.997              | 0.445              | -0.048                           |
| 845          | Tessera 2024    | United Kingdom       | 88.6                           | 2.9                | 0.923              | -0.560             | 1.000                            |
| 845          | Tessera 2024    | Ireland              | 2898.9                         | 874.5              | 0.888              | -0.963             | 0.889                            |
| 845          | Tessera 2024    | China                | 561985.6                       | 519329.1           | 0.820              | -0.940             | 0.546                            |
| 845          | Tessera 2024    | Japan                | 111021.9                       | 44866.8            | 0.810              | -0.754             | 0.524                            |
| 845          | Tessera 2024    | USA                  | 611573.8                       | 343590.7           | 0.829              | -0.941             | 0.501                            |
| 845          | Tessera 2024    | Georgia              | 11.7                           | 11.7               | 0.889              | -                  | 0.494                            |
| 845          | Tessera 2024    | Peru                 | 176.5                          | 164.9              | 0.853              | -0.102             | 0.486                            |
| 845          | Tessera 2024    | New Zealand          | 90267.0                        | 67948.5            | 0.830              | -0.799             | 0.454                            |
| 845          | Tessera 2024    | New Caledonia        | 281.0                          | 269.1              | 0.859              | 0.617              | 0.449                            |
| 845          | Tessera 2024    | Central African Rep. | 12.8                           | 0.9                | 0.972              | -0.624             | 0.404                            |
| 845          | Tessera 2024    | Mexico               | 16563.8                        | 12476.4            | 0.835              | -0.815             | 0.385                            |

|      |              |                 |           |          |       |        |        |
|------|--------------|-----------------|-----------|----------|-------|--------|--------|
| 845  | Tessera 2024 | Brazil          | 13.1      | 13.1     | 0.919 | -      | 0.382  |
| 845  | Tessera 2024 | India           | 7031.7    | 2697.0   | 0.852 | -0.788 | 0.382  |
| 845  | Tessera 2024 | Myanmar         | 1418.2    | 1391.9   | 0.849 | -0.745 | 0.375  |
| 845  | Tessera 2024 | Australia       | 15590.8   | 13917.0  | 0.893 | -0.708 | 0.370  |
| 845  | Tessera 2024 | Thailand        | 401.1     | 400.5    | 0.902 | -      | 0.361  |
| 845  | Tessera 2024 | Nepal           | 64150.5   | 55493.5  | 0.856 | -0.824 | 0.351  |
| 845  | Tessera 2024 | Bolivia         | 16.4      | 16.4     | 0.954 | -      | 0.337  |
| 1564 | AE 2022      | United Kingdom  | 72413.7   | 18.9     | 0.895 | -0.648 | 1.000  |
| 1564 | AE 2022      | Germany         | 18747.9   | 130.5    | 0.901 | -0.659 | 0.931  |
| 1564 | AE 2022      | Hungary         | 5078.3    | 498.6    | 0.850 | -0.959 | 0.787  |
| 1564 | AE 2022      | Lithuania       | 258.7     | 13.2     | 0.919 | -0.001 | 0.784  |
| 1564 | AE 2022      | Ireland         | 10101.6   | 14.2     | 0.923 | -0.330 | 0.753  |
| 1564 | AE 2022      | Sweden          | 4713.3    | 43.2     | 0.904 | -0.530 | 0.747  |
| 1564 | AE 2022      | Austria         | 1777.3    | 20.0     | 0.910 | -0.879 | 0.731  |
| 1564 | AE 2022      | Ukraine         | 34898.9   | 4034.6   | 0.902 | -0.481 | 0.657  |
| 1564 | AE 2022      | Czechia         | 5509.9    | 4.3      | 0.942 | -0.252 | 0.638  |
| 1564 | AE 2022      | Estonia         | 3854.9    | 1644.9   | 0.920 | -0.056 | 0.602  |
| 1564 | AE 2022      | Slovakia        | 36.6      | 27.7     | 0.970 | -0.696 | 0.600  |
| 1564 | AE 2022      | Belarus         | 1260.8    | 188.8    | 0.892 | -0.856 | 0.585  |
| 1564 | AE 2022      | Bulgaria        | 28023.1   | 240.7    | 0.896 | -0.445 | 0.520  |
| 1564 | AE 2022      | Spain           | 16879.0   | 54.1     | 0.862 | -0.944 | 0.473  |
| 1564 | AE 2022      | Romania         | 1272.0    | 478.8    | 0.853 | -0.971 | 0.454  |
| 1564 | AE 2022      | USA             | 11280.6   | 8744.4   | 0.864 | -0.660 | 0.385  |
| 1564 | AE 2022      | Russia          | 1775353.6 | 831885.5 | 0.881 | -0.612 | 0.318  |
| 1564 | AE 2022      | Greece          | 3462.0    | 384.0    | 0.835 | -0.852 | 0.284  |
| 1564 | AE 2022      | Morocco         | 42.1      | 3.0      | 0.939 | -0.045 | 0.255  |
| 1564 | AE 2022      | North Macedonia | 716.9     | 2.8      | 0.799 | -0.335 | 0.204  |
| 1564 | AE 2022      | Ecuador         | 804.1     | 567.1    | 0.937 | -0.601 | 0.122  |
| 1564 | AE 2022      | China           | 259494.8  | 45072.0  | 0.835 | -0.025 | 0.108  |
| 1564 | AE 2022      | Canada          | 1769.4    | 1395.2   | 0.912 | -0.476 | 0.070  |
| 1564 | AE 2022      | Mexico          | 1269.3    | 72.4     | 0.948 | 0.323  | 0.041  |
| 1564 | AE 2022      | Chile           | 150.9     | 148.5    | 0.936 | -0.766 | -0.019 |
| 1564 | AE 2022      | Argentina       | 47.4      | 47.6     | 0.945 | -      | -0.020 |
| 1564 | AE 2022      | Australia       | 2780.4    | 249.8    | 0.928 | -0.949 | -0.029 |
| 1564 | AE 2022      | New Zealand     | 1349.8    | 17.6     | 0.879 | -0.334 | -0.056 |
| 1564 | Tessera 2024 | United Kingdom  | 72413.7   | 20.2     | 0.819 | -0.876 | 1.000  |
| 1564 | Tessera 2024 | Spain           | 16879.0   | 56.9     | 0.845 | -0.961 | 0.916  |
| 1564 | Tessera 2024 | Germany         | 18747.9   | 133.6    | 0.844 | -0.866 | 0.910  |
| 1564 | Tessera 2024 | Lithuania       | 258.7     | 13.9     | 0.861 | -0.733 | 0.910  |

|      |              |                 |           |          |       |        |       |
|------|--------------|-----------------|-----------|----------|-------|--------|-------|
| 1564 | Tessera 2024 | Hungary         | 5078.3    | 516.3    | 0.828 | -0.972 | 0.895 |
| 1564 | Tessera 2024 | Austria         | 1777.3    | 20.8     | 0.850 | -0.905 | 0.866 |
| 1564 | Tessera 2024 | Ireland         | 10101.6   | 15.3     | 0.852 | -0.569 | 0.866 |
| 1564 | Tessera 2024 | Sweden          | 4713.3    | 44.2     | 0.849 | -0.825 | 0.863 |
| 1564 | Tessera 2024 | Ukraine         | 34898.9   | 4266.8   | 0.835 | -0.759 | 0.838 |
| 1564 | Tessera 2024 | Czechia         | 5509.9    | 4.3      | 0.863 | -0.759 | 0.836 |
| 1564 | Tessera 2024 | Slovakia        | 36.6      | 28.3     | 0.914 | -0.879 | 0.799 |
| 1564 | Tessera 2024 | Belarus         | 1260.8    | 202.3    | 0.823 | -0.937 | 0.782 |
| 1564 | Tessera 2024 | Romania         | 1272.0    | 493.3    | 0.851 | -0.982 | 0.762 |
| 1564 | Tessera 2024 | Estonia         | 3854.9    | 1672.4   | 0.843 | -0.538 | 0.753 |
| 1564 | Tessera 2024 | Bulgaria        | 28023.1   | 252.7    | 0.843 | -0.684 | 0.674 |
| 1564 | Tessera 2024 | USA             | 11280.6   | 9316.3   | 0.839 | -0.866 | 0.662 |
| 1564 | Tessera 2024 | Russia          | 1775353.6 | 863162.5 | 0.783 | -0.857 | 0.603 |
| 1564 | Tessera 2024 | Greece          | 3462.0    | 405.0    | 0.861 | -0.919 | 0.580 |
| 1564 | Tessera 2024 | New Zealand     | 1349.8    | 18.9     | 0.818 | -0.576 | 0.573 |
| 1564 | Tessera 2024 | Canada          | 1769.4    | 1477.4   | 0.756 | -0.563 | 0.544 |
| 1564 | Tessera 2024 | Morocco         | 42.1      | 3.1      | 0.943 | -0.764 | 0.489 |
| 1564 | Tessera 2024 | Mexico          | 1269.3    | 73.2     | 0.903 | -0.291 | 0.485 |
| 1564 | Tessera 2024 | Argentina       | 49.1      | 49.1     | 0.902 | -      | 0.467 |
| 1564 | Tessera 2024 | China           | 259494.8  | 47946.1  | 0.812 | -0.230 | 0.467 |
| 1564 | Tessera 2024 | Chile           | 150.9     | 149.9    | 0.886 | -0.472 | 0.458 |
| 1564 | Tessera 2024 | North Macedonia | 716.9     | 2.9      | 0.904 | 0.286  | 0.440 |
| 1564 | Tessera 2024 | Ecuador         | 804.1     | 568.1    | 0.937 | -0.752 | 0.433 |
| 1564 | Tessera 2024 | Australia       | 2780.4    | 258.8    | 0.868 | -0.989 | 0.408 |
| 2932 | AE 2022      | United Kingdom  | 574595.6  | 362201.4 | 0.865 | -0.936 | 1.000 |
| 2932 | AE 2022      | Norway          | 2.5       | 1.5      | 0.907 | 0.775  | 0.622 |
| 2932 | AE 2022      | USA             | 7622.4    | 1318.9   | 0.640 | -0.453 | 0.329 |
| 2932 | AE 2022      | Russia          | 30.6      | 1.5      | 0.972 | 0.386  | 0.221 |
| 2932 | AE 2022      | Canada          | 377.0     | 362.5    | 0.930 | 0.744  | 0.165 |
| 2932 | AE 2022      | Switzerland     | 92.4      | 2.5      | 0.954 | -0.330 | 0.157 |
| 2932 | AE 2022      | Angola          | 8.8       | 8.8      | 0.989 | -      | 0.052 |
| 2932 | Tessera 2024 | United Kingdom  | 574595.6  | 360642.8 | 0.868 | -0.931 | 1.000 |
| 2932 | Tessera 2024 | Norway          | 2.5       | 1.7      | 0.909 | 0.627  | 0.789 |
| 2932 | Tessera 2024 | USA             | 7622.4    | 1325.7   | 0.769 | -0.768 | 0.704 |
| 2932 | Tessera 2024 | Switzerland     | 92.4      | 2.3      | 0.829 | -0.797 | 0.649 |
| 2932 | Tessera 2024 | Canada          | 377.0     | 367.9    | 0.832 | 0.525  | 0.613 |
| 2932 | Tessera 2024 | Russia          | 30.6      | 1.6      | 0.901 | 0.315  | 0.591 |
| 2932 | Tessera 2024 | Angola          | 8.6       | 8.6      | 0.964 | -      | 0.341 |

**Table S3.** Tessera UK genosoil temporal stability between 2022 and 2024. Inter-annual silhouette measures the separation between year-specific pixel populations relative to the within-year spread, with values closer to 1 indicating a stronger separation between years, and values closer to 0 indicating greater overlap and thus higher temporal stability. The centroid cosine similarity is calculated between the UK genosoil centroids of 2022 and 2024.

| <b>Pedogenon ID</b> | <b>Genosoil pixels in 2022</b> | <b>Genosoil pixels in 2024</b> | <b>Cohesion in 2022</b> | <b>Cohesion in 2024</b> | <b>Cohesion change (2024-2022)</b> | <b>Inter-annual silhouette</b> | <b>Centroid cosine similarity (2022 vs 2024)</b> |
|---------------------|--------------------------------|--------------------------------|-------------------------|-------------------------|------------------------------------|--------------------------------|--------------------------------------------------|
| 845                 | 294                            | 294                            | 0.916                   | 0.923                   | 0.007                              | 0.651                          | 0.858                                            |
| 1564                | 2017                           | 2017                           | 0.820                   | 0.819                   | -0.002                             | 0.109                          | 0.978                                            |
| 2932                | 36136094                       | 36064279                       | 0.874                   | 0.868                   | -0.007                             | 0.122                          | 0.982                                            |

**Table S4.** World Reference Base (WRB) raster composition for each pedogenon within the UK, derived from SoilGrids 250 m WRB predictions (Poggio et al., 2021).

| <b>Pedogenon</b> | <b>WRB reference soil group</b> | <b>Area (km<sup>2</sup>)</b> | <b>Share of pedogenon area (%)</b> |
|------------------|---------------------------------|------------------------------|------------------------------------|
| 845              | Acrisols                        | 8301.9                       | 46.73                              |
| 845              | Cambisols                       | 4860.3                       | 27.36                              |
| 845              | Alisols                         | 2791.1                       | 15.71                              |
| 845              | Andosols                        | 997.7                        | 5.62                               |
| 845              | Leptosols                       | 436.4                        | 2.46                               |
| 845              | Luvisols                        | 143.2                        | 0.81                               |
| 845              | Regosols                        | 118.2                        | 0.67                               |
| 845              | Nitisols                        | 34.8                         | 0.2                                |
| 845              | Fluvisols                       | 28.1                         | 0.16                               |
| 845              | Podzols                         | 25.4                         | 0.14                               |
| 845              | Gleysols                        | 20.3                         | 0.11                               |
| 845              | Ferralsols                      | 4.2                          | 0.02                               |
| 845              | Phaeozems                       | 2.4                          | 0.01                               |
| 845              | Technosols                      | 0.3                          | 0.0                                |
| 845              | Arenosols                       | 0.1                          | 0.0                                |
| 1564             | Phaeozems                       | 16236.3                      | 41.72                              |
| 1564             | Albeluvisols                    | 13607.8                      | 34.97                              |
| 1564             | Cambisols                       | 4014.8                       | 10.32                              |
| 1564             | Luvisols                        | 3375.9                       | 8.67                               |
| 1564             | Chernozems                      | 537.2                        | 1.38                               |
| 1564             | Gleysols                        | 369.1                        | 0.95                               |
| 1564             | Fluvisols                       | 340.4                        | 0.87                               |
| 1564             | Histosols                       | 159.0                        | 0.41                               |
| 1564             | Podzols                         | 80.1                         | 0.21                               |
| 1564             | Kastanozems                     | 47.1                         | 0.12                               |
| 1564             | Alisols                         | 41.6                         | 0.11                               |
| 1564             | Technosols                      | 36.3                         | 0.09                               |
| 1564             | Arenosols                       | 24.5                         | 0.06                               |
| 1564             | Cryosols                        | 19.9                         | 0.05                               |
| 1564             | Retisols                        | 14.6                         | 0.04                               |
| 1564             | Ferralsols                      | 5.2                          | 0.01                               |
| 1564             | Andosols                        | 4.3                          | 0.01                               |
| 1564             | Calcisols                       | 1.8                          | 0.0                                |
| 1564             | Solonchaks                      | 0.6                          | 0.0                                |
| 1564             | Planosols                       | 0.4                          | 0.0                                |
| 1564             | Acrisols                        | 0.3                          | 0.0                                |
| 1564             | Regosols                        | 0.2                          | 0.0                                |
| 1564             | Leptosols                       | 0.1                          | 0.0                                |
| 1564             | Lixisols                        | 0.1                          | 0.0                                |
| 2932             | Podzols                         | 7621.6                       | 74.42                              |
| 2932             | Cambisols                       | 1990.5                       | 19.44                              |
| 2932             | Gleysols                        | 618.4                        | 6.04                               |
| 2932             | Leptosols                       | 7.9                          | 0.08                               |
| 2932             | Luvisols                        | 2.2                          | 0.02                               |
| 2932             | Andosols                        | 0.2                          | 0.00                               |

**Table S5.** Great Group and associated landform summary for the United States occurrences of the three study pedogenons. Great Group composition is derived from component-weighted gSSURGO taxonomy outputs, and landforms are derived from the NRCS `cogeomordesc` table linked at the component level. Great Group shares are reported as percentages of total pedogenon component weight in the United States subset, whereas landform shares are reported as percentages within each Great Group. Great Groups contributing at least 5 % are shown together with their three most abundant non-zero associated landforms. The Great Groups shown account for 77.9-92.3 % of pedogenon composition across the three case studies.

| <b>Pedogenon</b> | <b>Great Group</b> | <b>Great Group share of pedogenon (%)</b> | <b>Landform 1</b> | <b>Landform 1 share within Great Group (%)</b> | <b>Landform 2</b> | <b>Landform 2 share within Great Group (%)</b> | <b>Landform 3</b> | <b>Landform 3 share within Great Group (%)</b> |
|------------------|--------------------|-------------------------------------------|-------------------|------------------------------------------------|-------------------|------------------------------------------------|-------------------|------------------------------------------------|
| 845              | Hapludults         | 67.29                                     | hillslopes        | 29.4                                           | interfluves       | 29.3                                           | ridges            | 21.1                                           |
| 845              | Dystrudepts        | 14.07                                     | hillslopes        | 45.6                                           | ridges            | 32.9                                           | escarpments       | 9.8                                            |
| 845              | Dystrochrepts      | 10.92                                     | hillslopes        | 51.1                                           | ridges            | 34.9                                           | coves             | 14.1                                           |
| 1564             | Udipsamments       | 69.55                                     | deltas            | 67.9                                           | moraines          | 12.1                                           | outwash plains    | 8.7                                            |
| 1564             | Haplosaprists      | 8.82                                      | depressions       | 86.1                                           | swales            | 5.8                                            | deltas            | 5.7                                            |
| 1564             | Endoaquods         | 5.43                                      | deltas            | 61.4                                           | lake plains       | 28.2                                           | lake terraces     | 10.4                                           |
| 2932             | Quartzipsamments   | 42.42                                     | moraines          | 99.3                                           | outwash terraces  | 0.7                                            | -                 | -                                              |
| 2932             | Udipsamments       | 16.56                                     | outwash plains    | 56.2                                           | dikes             | 22.8                                           | outwash terraces  | 11.1                                           |
| 2932             | Haplosaprists      | 13.76                                     | depressions       | 94.3                                           | swamps            | 5.7                                            | -                 | -                                              |
| 2932             | Xerochrepts        | 5.17                                      | mountain slopes   | 100                                            | -                 | -                                              | -                 | -                                              |

**Table S6.** World Reference Base (WRB) soil profile records located within the global occurrences of the three study pedogenons (Hengl and Gupta, 2025).

| Profile ID | Pedogenon | Assigned WRB profile class      | WRB grouping label | Source database                     | Longitude          | Latitude           |
|------------|-----------|---------------------------------|--------------------|-------------------------------------|--------------------|--------------------|
| 207839     | 845       | Endoleptic<br>Luvisols Abruptic | Abruptic           | {MX-INEGI}                          | -95.50109289       | 16.8669264         |
| 64904      | 845       | Haplic Alisols                  | Alisols            | {CN-SOTER}                          | 118.11187744       | 30.14492989        |
| 64904      | 845       | Ferric Alisols                  | Alisols            | {CN-SOTER}                          | 118.11187744       | 30.14492989        |
| SIM51744   | 845       | Haplic Acrisols                 | Acrisols           | HWSDv2                              | -84.09094357638483 | 35.32400275978988  |
| SIM87807   | 845       | Dystric Regosols                | Regosols           | HWSDv2                              | 118.59019265096369 | 30.383268697132515 |
| 2742       | 1564      | Eutric Planosols                | Planosols          | BZE_LW                              | 12.560489622196622 | 51.18087491096414  |
| 607393     | 1564      | Haplic<br>Chernozems            | Chernozems         | {RU-SPDB}                           | 36.29999924        | 51.29999924        |
| 607393     | 1564      | Luvic Chernozems                | Chernozems         | {RU-SPDB}                           | 36.29999924        | 51.29999924        |
| 63778      | 1564      | Calcaric Cambisols              | Cambisols          | {WD-ISIS}                           | 13.41305556        | 55.54805556        |
| 63778      | 1564      | Eutric Cambisols                | Cambisols          | {WD-ISIS}                           | 13.41305556        | 55.54805556        |
| 65099      | 1564      | Dystric Gleysols                | Gleysols           | {CN-SOTER}                          | 122.07846832       | 41.41205597        |
| 65099      | 1564      | Eutric Gleysols                 | Gleysols           | {CN-SOTER}                          | 122.07846832       | 41.41205597        |
| 70364      | 1564      | Eutric Planosols                | Planosols          | {EU-SOTER,EU-<br>SPADE,WD-<br>WISE} | 27.2               | 57.84972222        |
| 70364      | 1564      | Dystric Planosols               | Planosols          | {EU-SOTER,EU-<br>SPADE,WD-<br>WISE} | 27.2               | 57.84972222        |
| SIM13684   | 1564      | Cambic Umbrisols                | Umbrisols          | HWSDv2                              | -5.194847363232742 | 43.4662615190105   |
| SIM61025   | 1564      | Greyzemic<br>Phaeozems          | Phaeozems          | HWSDv2                              | 49.73152185915074  | 55.944649991583    |
| 612391     | 2932      | Cambic Umbrisols                | Umbrisols          | {WD-eSOTER}                         | -4.86389017        | 57.99440002        |
| 612391     | 2932      | Aeric Umbrisols                 | Umbrisols          | {WD-eSOTER}                         | -4.86389017        | 57.99440002        |
| 612393     | 2932      | Rustic Podzols                  | Podzols            | {WD-eSOTER}                         | -3.89582992        | 57.20560074        |
| 612393     | 2932      | Albic Podzols                   | Podzols            | {WD-eSOTER}                         | -3.89582992        | 57.20560074        |
| 612470     | 2932      | Fibric Histosols                | Histosols          | {WD-eSOTER}                         | -4.75              | 58.03609848        |
| 612470     | 2932      | Sapric Histosols                | Histosols          | {WD-eSOTER}                         | -4.75              | 58.03609848        |
| 66794      | 2932      | Rustic Podzols                  | Podzols            | {WD-WISE}                           | -3.625             | 57.20833333        |
| 66794      | 2932      | Albic Podzols                   | Podzols            | {WD-WISE}                           | -3.625             | 57.20833333        |

---

|       |      |                |         |           |             |             |
|-------|------|----------------|---------|-----------|-------------|-------------|
| 66798 | 2932 | Rustic Podzols | Podzols | {WD-WISE} | -3.67777778 | 57.23888889 |
| 66798 | 2932 | Albic Podzols  | Podzols | {WD-WISE} | -3.67777778 | 57.23888889 |
| 66799 | 2932 | Rustic Podzols | Podzols | {WD-WISE} | -4.10416667 | 57.20555556 |
| 66799 | 2932 | Albic Podzols  | Podzols | {WD-WISE} | -4.10416667 | 57.20555556 |

---
